# Supplementary material for: Cuticle hydrocarbons in saline aquatic beetles
Source: PeerJ. 2017 Jul 14;5:e3562. doi: 10.7717/peerj.3562 (PMC5511699; doi:10.7717/peerj.3562)
Supplement: Supplemental Information 1 [file peerj-05-3562-s001.xlsx]

## Sheet: Hoja1
ID	Compound	KI	Class	Nebrioporus baeticus																													Enochrus jesusarribasi
				Larvae										Adults																			Larvae
														Males										Females
				LN1	LN2	LN3	LN4	LN5	LN6	LN7	LN8	LN9	LN10	NM1	NM2	NM3	NM4	NM5	NM6	NM7	NM8	NM9	NM10	NF1	NF2	NF3	NF4	NF5	NF6	NF7	NF8	NF9	LE1	LE2	LE3	LE4	LE5	LE6	LE7	LE8	LE9	LE10	LE11	LE12	LE13	LE14	LE15	LE16	LE17
1	Tetradecane	1400	Alkane	0	0	0	0	0	0	0	0	0	0	0	0	0	0	0	0	0	0	0	0	0	0	0	0	0	0	0	0	0	2.42005	2.48482	2.73321	1.67056	1.99704	0	2.50998	2.60913	2.31023	1.94553	7.12042	3.02648	0	3.72549	0	3.21212	2.97372
2	Pentadecane	1500	Alkane	0	0	0	0	0	0	0	0	0	0	0	0	0	0	0	0	0	0	0	0	0	0	0	0	0	0	0	0	0	0	1.43567	0	1.00234	0	0	1.36908	0	0	1.21595	0	0	0	0	0	1.69697	0
3	n-Hexadecene	1593	Unsaturated	3.37987	2.99202	2.51845	2.85247	2.41814	2.4758	2.64457	2.6694	2.71399	2.80097	0.324714	0.36226	0.299426	0.176442	0.207678	0.223904	0.351302	0.185599	0.220814	0.324714	0.508751	0.248747	0.414222	0.971219	0.456724	0.527631	0.235547	0.275474	0.313042	4.5376	7.06792	6.7142	4.67758	4.69675	4.35284	6.67427	5.21826	5.13909	5.93385	13.089	6.74653	11.4496	10	10.9307	7.09091	7.05394
4	Hexadecane	1599	Alkane	2.57164	2.41578	2.17108	2.12573	1.83039	1.88012	2.04513	2.02772	2.05289	2.26232	0.151533	0.15921	0	0	0	0	0	0	0	0.151533	0.196717	0.106606	0.172592	0	0.217131	0.249931	0	0.115033	0	3.63008	5.35616	6.12002	3.90912	3.69822	2.88268	5.1911	5.01756	4.9505	4.0856	10.5759	5.42245	9.97899	8.82353	9.84848	5.51515	6.70816
5	Heptadecane	1701	Alkane	3.13495	1.48493	2.4099	1.88953	1.25945	2.32688	2.50353	2.46407	2.47042	1.45435	0.184988	0.170747	0.168171	0.12351	0	0.143299	0.173632	0.12746	0.124719	0.184988	0.2442	0.124374	0.195605	0.497454	0.262055	0.286957	0.135093	0.13925	0.165059	2.20398	2.15351	4.0404	4.31006	3.06953	1.84491	6.21791	1.45509	2.02735	3.35603	5.96859	4.09836	3.9916	3.72549	3.78788	1.69697	6.36238
6	n-methyl-heptadecane	1760	Branched alkane	0.587803	0.376773	0.412505	0	0	0.409531	0.511283	0.462012	0.487126	0	0	0	0	0	0	0	0	0	0	0	0	0	0	0	0	0	0	0	0	0	0	0	0	0	0	0	0	0	0	0	0	0	0	0	0	0
7	Unidentified	1772	Branched alkane	0.710262	0.421099	0.455927	0.327035	0.268682	0.428146	0.546544	0.539014	0.539318	0	0	0	0	0	0	0	0	0	0	0	0	0	0	0	0	0	0	0	0	0	0	0	0	0	0	0	0	0	0	0	0	0	0	0	0	0
8	n-octadecene	1795	Unsaturated	15.6013	13.5638	11.9627	12.3365	10.8312	11.7089	12.1474	12.2947	12.0912	13.0891	1.11977	1.17446	1.39048	0.99816	0.98647	1.40164	1.53039	0.997317	0.893478	1.11977	2.09605	1.1016	1.77195	4.14545	2.26116	2.83255	1.16734	1.25931	1.2664	16.1625	23.0812	22.1034	17.3405	17.3447	13.7792	23.6737	19.418	17.9161	16.5856	28.377	19.2308	28.9916	28.6275	32.5758	23.0909	23.9972
9	Unidentified	1810	Branched alkane	3.2819	2.63741	1.73686	2.56177	2.56927	1.63812	2.82087	2.5924	2.45303	2.28925	0	0	0	0	0	0	0	0	0	0	0	0	0	0	0	0.601685	0	0.254283	0	0	0	0	0	0	0	0	0	0	6.03113	10.9948	6.55738	0	11.2745	0	10.4242	12.3098
10	Unidentified	1821	Branched alkane	0	0	0	0	0	0	0	0	0	0	0	0	0	0	0	0	0	0	0	0	0	0	0	0	0	0	0	0	0	0	0	0	0	0	0	0	0	0	4.37743	0	0	0	0	7.79221	4.06061	6.08575
11	Nonadecane	1883	Alkane	1.98384	1.52926	1.30265	1.36265	1.1419	1.39613	1.63963	1.56571	1.79193	1.48128	0.214508	0	0	0	2.18062	0	0	0	0	0.214508	0.210284	0	0	0	0	0	0	0	0	1.90147	2.09829	2.07962	1.53692	1.70118	0	2.2818	1.80632	1.74446	1.26459	0	0	0	0	0	2.54545	2.48963
12	Unidentified	1907	Unsaturated	0	0	0	0	0	0	0	0	0	0	0	0	0	0	0	0	0	0	0	0	0	0	0	0	0	0	0	0	0	0	0	0	0	0	5.88066	0	0	0	0	0	0	0	0	0	0	0
13	Unidentified	1933	Branched alkane	0	0	0	0	0	0	0	0	0	0	0	0	0	0	0	0	0	0	0	0	0	0	0	0	0	0	0	0	0	0	0	0	0	0	0	0	0	0	0	0	0	0	0	0	0	0
14	Unsaturated	1945-1948	Unsaturated	0	0	0	0	0	0	0	0	0	0	0	0	0	0	0	0	0	0	0	0	0	0	0	0	0	0	0	0	0	0	0	0	0	0	0	0	0	0	0	0	0	0	0	0	0	0
15	Unsaturated	1954-1959	Unsaturated	0	0	0	0	0	0	0	0	0	0	0.161373	0.154595	0	0	0	0	0	0	0	0.161373	0	0	0	0	0	0	0	0	0	0	0	0	0	0	0	0	0	0	0	0	0	0	0	0	0	0
16	2-methyl-nonadecane	1991-1966	Branched alkane	1.51849	1.21897	0.629614	1.14462	1.71285	0.893522	1.09309	1.20637	1.13083	0	0	0	0	0	0	0	0	0	0	0	0	0	0	0	0	0	0	0	0	0	0	0	0	0	0	0	0	0	0	0	0	0	0	0	0	0
17	n-Eicosene	1992-1993	Unsaturated	14.94	15.5363	13.6561	13.9535	12.6448	13.4959	13.3992	11.7813	11.9346	15.0013	0	0	0	0	0	0	0	0	0	0	0	0	0	0	0	0	0	0	0	16.3354	19.2711	18.063	15.1019	15.4956	14.0386	21.4489	17.2604	14.71	11.0409	17.6963	15.6999	17.9622	22.2549	22.8355	20.8485	19.018
18	Eicosane	1996-1998	Alkane	0	0	0	0	0	0	0	0	0	0	1.52911	1.42135	1.4192	1.13931	1.05061	1.21804	1.63133	1.10465	1.05091	1.52911	2.12997	1.09093	1.70291	4.10991	2.18628	2.49931	1.17773	1.30169	1.47984	0	0	0	0	0	0	0	0	0	0	0	0	0	0	0	0	0
19	Unsaturated	2087-2093	Unsaturated	1.22459	0	0.412505	0.272529	1.32662	0.316456	0.105783	0.975359	1.27001	0	0	0	0	0	0	0	0	0	0	0	0	0	0	0	0	0	0	0	0	0	0	0	0	0	5.10233	0	0	0	0	0	0	0	0	0	0	0
20	Unsaturated	2095	Unsaturated	0	0	0	0	0	0	0	0	0	0	0	0	0	0	0	0	0	0	0	0	0	0	0	0	0	0	0	0	0	0	0	0	0	0	0	0	0	0	4.18288	0	0	0	0	0	0	0
21	Heneicosane	2102	Alkane	0	0	0	0	0	0	0	0	0	0	0	0	0	0	6.41664	0	0	0	0	0	2.12997	1.09093	1.70291	4.10991	2.18628	2.49931	1.17773	1.30169	1.47984	0	0	0	0	0	NA	0	0	0	0	0	0	0	0	0	0	0
22	Unsaturated	2113	Unsaturated	0	0	0	0	0	0	0	0	0	0	1.86366	3.38725	1.53404	3.08522	2.34554	2.92419	2.84272	2.54249	2.76631	1.86366	1.96039	6.04811	2.45656	0.580362	3.63133	3.36018	2.48017	2.39148	2.89137	0	0	0	0	0	14.0675	0	0	0	32.3444	0	0	0	0	0	2.36364	0
23	n-methyl-heneicosane	2137-2138	Branched alkane	0	0	0	0	0	0	0	0	0	0	0	0.25612	0	0	0	0	0.37553	0.169946	0.167655	0	0.18315	0	0	0	0	0	0	0	0.190671	0	0	0	0	0	0	0	0	0	0	0	0	0	0	0	0	0
24	Unidentified	2142-2144	Unsaturated	0	0	0	0	0	0	0	0	0	0	0	0	0	0	0	0	0	0	0	0	0	0	0	0	0	0	0	0	0	0	0	0	0	0	0	0	0	0	0	0	0	0	0	0	0	0
25	Unidentified	2147-27149	Unsaturated	3.62479	3.28014	1.86713	2.1984	2.40134	2.3455	1.58674	2.84908	1.67015	4.49771	0	0	0	0	0	0	0	0	0	0	0	0	0	0	0	0	0	0	0	4.79689	5.57703	5.94177	1.7708	4.77071	6.77429	0	0	5.752	0	0	0	0	0	0	0	0
26	Unidentified	2151	Unsaturated	1.73892	1.59574	0	1.2718	1.37699	0.837677	0	1.38604	0.835073	1.72367	0	0.500704	0	0.307514	0	0	0	0	0	0	0.691901	0.355353	0.333679	0.094753	2.02156	0.453578	0.491877	0.563056	0.623239	0	0	0	0	0	0	0	0	0	0	0	0	0	0	0	0	0
27	Unidentified	2164-2165	Unsaturated	0	0	0	0	0	0	0	0	0	0	0	0	0	0	0	0	0	0	0	0	0	0	0	0	0	0	0	0	0	0	0	0	0	0.850592	7.61026	0	0	0	0	0	0	0	0	0	0	0
28	Unidentified	2169	Unsaturated	0	0	0	0	0	0	0	0	0	0	0	0	0	0	0	0	0	0	0	0	0	0	0	0	0	0	0	0	0	0	0	0	0	0	NA	0	0	0	0	0	0	0	0	0	0	0
29	Unidentified	2188-2189	Unsaturated	13.8379	12.3892	10.7469	11.9913	10.3946	11.2621	11.354	10.883	10.682	11.958	0	0	0	0	0	0	0	0	0	0	0	0	0	0	0	0	0	0	0	0	0	0	0	0.961538	5.85183	0	0	0	0	0	0	0	0	0	1.69697	0
30	Docosene	2192-2193	Unsaturated	3.06147	17.2651	29.5918	26.4353	30.0084	27.2338	26.7102	23.6396	25.3653	20.307	0	0	0	0	0	0	0.254391	0	0	0	0	0	0	0	0	0	0	0	0.182134	8.85912	11.0988	9.86334	8.51988	9.83728	13.1738	13.0633	11.2393	9.75955	4.0856	6.17801	8.19672	8.5084	11.5686	12.2294	10.9091	9.3361
31	Docosane	2198	Alkane	2.15528	1.41844	1.82371	1.5625	1.1251	1.97319	0.934415	1.69405	1.39179	2.58551	0.436887	0.30919	0.21329	0.16636	0	0	0.39572	0.319767	0.23717	0.436887	0	0	0	0	0	0	0	0.133196	0.381343	0	0	0	0	0	0	0	0	0	0	0	0	0	0	0	0	0
32	5-dimethyl-docosane	2234	Branched alkane	0.881705	0.753546	0	0	0.453401	0	0	0.693018	0	0.700242	1.03712	0.994485	1.04594	0.849444	1.16361	0.815011	1.14274	0.805009	0.752402	1.03712	1.36345	0.732028	1.10459	0.153974	1.5274	1.58289	0.807094	0.932373	1.08996	0	0	0	0	0	0	0	0	0	0	0	0	0	0	0	0	0
33	Unidentified	2267-2268	Unsaturated	5.70659	5.74025	3.62571	3.56105	3.644	3.07148	2.64457	4.49179	3.2881	6.62537	0.348329	0.42456	0	0.398256	1.36212	0.273163	0	0.400268	0.349622	0.348329	0	0.454852	0.22437	0.0473765	0.24708	0	0.263258	0.233093	0.42403	0	0	0	0	0	0	0	0	0	0	0	0	0	0	0	0	0
34	Unidentified	2272	Unsaturated	10.6049	9.24202	5.99218	6.46802	5.59194	6.12435	8.48025	8.34189	8.24635	8.94156	0	0.433789	0	0.226855	0	0	0	0	0	0	0.501967	0.277176	0.327925	0.0829089	0.314465	0.361011	0.336001	0.275474	0.384189	0	0	0	0	0	0	0	0	0	0	0	0	0	0	0	0	0
35	9-Tricosene	2278-2279	Unsaturated	0.930688	0	0.607903	0.672238	0.755668	0.893522	1.42807	0.718686	0.59151	0	0.576613	0.851427	0.689089	0.438585	0.369545	0.273163	0.444175	0.581395	0.505009	0.576613	0.501967	0.607654	0.258889	0.461921	0.381851	0	0.588867	0.460132	0.805373	34.3993	14.2463	17.6471	32.6094	29.4749	NA	11.2949	29.7541	30.9288	3.55058	0	27.3014	19.1176	0	0	0	0
36	Tricosane	2296	Alkane	3.35538	2.99202	3.69084	2.97965	4.28212	4.56069	2.85614	2.64374	4.03619	4.22839	3.11922	5.50082	4.60623	3.27931	3.03271	3.74815	3.82798	3.69857	3.50848	3.11922	5.14177	5.47955	3.29651	4.5363	5.3534	3.87855	3.43621	2.94545	3.74797	0	0	0	0	0	0	0	0	0	0	0	0	0	0	0	0	0
37	13-methyl-tricosane	2330-2331	Branched alkane	0	0	0.586192	0	0	0	0	0	0.539318	0	2.53277	3.46801	3.83101	2.24082	2.25697	2.20769	3.14153	3.10823	2.43508	2.53277	2.9304	3.59262	2.87079	6.26555	2.80773	2.02721	1.99522	1.93437	2.27952	0	0	0	0	0	NA	0	0	0	0	0	0	0	0	0	0	0
38	Unidentified	2338	Branched alkane	0.710262	0	0.434216	0	0.570949	0.614296	0.669958	0.564682	0.695894	0	0	0	0	0	0	0	0	0	0	0	0	0	0	0	0	0	0	0	0	0	0	0	0	0	0	0	0	0	0	0	0	0	0	0	0	0
39	n-dimethyl-tricosane	2363-2364	Branched alkane	4.45751	3.14716	2.71385	3.10683	2.63644	3.16456	3.19111	3.51643	3.72303	0.0538648	6.14988	6.53222	7.16981	9.09183	9.7853	11.7594	7.63578	8.34079	8.21509	6.14988	7.39384	12.5902	8.37073	1.52789	8.28092	10.6452	9.23136	5.58515	7.85167	0	0	0	0	0	0	0	0	0	0	0	0	0	0	0	0	0
40	Unidentified	2367-2370	Branched alkane	0	0	0.651324	0.926599	0.755668	0.949367	0.687588	0	0	0	5.26036	7.88205	5.76702	8.6482	5.44849	8.49044	7.72461	5.36002	4.45512	5.26036	16.3343	8.21222	11.4429	1.91875	6.64121	14.2923	11.6111	6.09675	8.14195	0	0	0	0	0	0	0	0	0	0	0	0	0	0	0	0	0
41	Unidentified	2372-2373	Branched alkane	0	0	0	0	0	0	0	0	0	0	1.3638	3.04806	1.1813	0.95783	0.958984	1.17773	1.63537	1.46691	1.15723	1.3638	0	0	0	0	0	0	0	0	0	0	0	0	0	0	0	0	0	0	0	0	0	0	0	0	0	0
42	Unidentified	2379-2380	Branched alkane	0	0	0	0	0	0	0	0	0	0	0.552997	0.886038	0.389664	0.405818	0	0.237338	0.193822	0.469589	0.423226	0.552997	3.2153	3.43271	2.12289	6.31292	2.51572	2.47154	1.90169	1.83447	2.54703	0	0	0	0	0	0	0	0	0	0	0	0	0	0	0	0	0
43	Unidentified	2388-2389	Unsaturated	0	0	0	0	0	0	0	0	0	0	0.419176	0.431482	0.303527	0	0	0	0	0.516547	0.273973	0.419176	0.739384	0.550798	0.489012	0.473765	0.381851	0.370268	0.516125	0.69928	0.788298	4.75367	6.12921	4.694	6.54861	6.10207	4.64111	6.27496	6.22178	4.7619	0	0	3.72005	0	0	0	4.84848	3.66528
44	Tetracosane	2393-2394	Alkane	0	0	0	0	0	0	0	0	0	0	0	0.346109	0	0	0	0	0	0	0	0	0.4477	0.23098	0	0.461921	0	0.398038	0.356784	0.345099	0.38988	0	0	0	0	0	0	0	0	0	0	0	0	0	0	0	0	0
45	Unidentified	2429	Branched alkane	0	0	0	0	0	0	0	0	0	0	0.698626	0.563003	0.705496	0.567136	0.516141	0.447808	0.747022	0.565742	0.519321	0.698626	0.644417	0.394442	0.592567	0.0829089	0.838574	0.796075	0.498805	0.665981	0.722844	0	0	0	0	0	0	0	0	0	0	0	0	0	0	0	0	0
46	2-methyl-tetracosane	2436-2440	Branched alkane	0	0	0	0	0	0	0	0	0	0	0.391624	0	0	0.408338	0.607763	0.380637	0.282657	0.447227	0.468207	0.391624	0	0.24164	0	0.450077	0	0	0.25633	0.227039	0.364268	0	0	0	0	0	0	0	0	0	0	0	0	0	0	0	0	0
47	Unidentified	2470-2471	Unsaturated	0	0	0	0	0	0	0	0	0	0	0.612036	0.62761	0	0.504121	0	0.367203	0.480517	0.453936	0.333265	0.612036	0.603717	0.394442	0.644345	0.722492	0	0.490604	0.543836	0.384452	0.591935	0	0	0	0	0	0	0	0	0	0	0	0	0	0	0	0	0
48	Pentacosene	2476-2477	Unsaturated	0	0	0	0	0	0	0	0	0	0	0.316842	0.62761	0.26251	0	0	0	0	0.13864	0.167655	0.316842	0	0	0	0	0	0	0	0	0.190671	0	0	0	0	0	0	0	0	0	0	0	0	0	0	0	0	0
49	Unidentified	2490	Branched alkane	0	0	0	0	0	0	0	0	0	0	8.88338	9.74873	11.4274	7.30976	8.37736	11.54	11.4516	9.23301	8.27438	8.88338	0	0	0	0	0	0	0	0	0	0	0	0	0	0	0	0	0	0	0	0	0	0	0	0	0	0
50	Pentacosane	2494-2495	Alkane	0	0	0	0	0	0	0	0	0	0	3.30618	2.91654	4.87285	3.87921	3.8512	4.36165	3.79972	3.53309	3.18135	3.30618	8.54701	8.73103	9.68243	4.95085	6.61875	7.85893	6.43251	4.89496	6.61089	0	0	0	0	0	NA	0	0	0	0	0	0	0	0	0	0	0
51	13-methyl-pentacosane	2528-2529	Branched alkane	0	0	0	0	0	0	0	0	0	0	0	0.602229	0.779327	0.236937	0	0	0	0	0.235126	0	9.18464	5.51864	10.5742	16.416	5.50314	4.26733	4.17403	3.1846	2.69501	0	0	0	0	0	0	0	0	0	0	0	0	0	0	0	0	0
52	9-methyl-pentacosane	2536	Branched alkane	0	0	0	0	0	0	0	0	0	0	0	0	0	0	0	0	0	0	0	0	3.96825	7.35937	5.97169	1.08966	5.45822	6.46117	8.70138	4.38336	8.04519	0	0	0	0	0	0	0	0	0	0	0	0	0	0	0	0	0
53	Unidentified	2544-2546	Branched alkane	0	0	0	0	0	0	0	0	0	0	6.26796	4.26406	5.98441	9.24054	11.8896	12.5386	7.17141	7.53131	9.61562	6.26796	2.80152	0	2.34726	0	4.03564	3.35092	0	0.980808	0	0	0	0	0	0	0	0	0	0	0	0	0	0	0	0	0	0
54	Unidentified	2547	Branched alkane	0	0	0	0	0	0	0	0	0	0	0	0	2.50205	0	0	0	1.40925	0	0	0	0	0	0	0	0	0	0	0	0	0	0	0	0	0	0	0	0	0	0	0	0	0	0	0	0	0
55	4-methyl-pentacosane	2559-2560	Branched alkane	0	0	0	0	0	0	0	0	0	0	0	0	15.0615	9.14224	4.76132	2.49877	7.4783	0	0	0	4.28707	4.48456	5.93142	4.66659	13.0054	1.88836	9.90336	21.7352	11.1159	0	0	0	0	0	0	0	0	0	0	0	0	0	0	0	0	0
56	9,17/5,17 dimethyl-pentacosane	2566-2568	Branched alkane	0	0	0	0	0	0	0	0	0	0	16.0901	13.4821	0	0	0	0	0	14.7518	13.8765	16.0901	5.84046	4.98916	5.94868	8.93047	3.08476	6.55374	5.98566	3.72041	4.07524	0	0	0	0	0	0	0	0	0	0	0	0	0	0	0	0	0
57	3-methyl-pentacosane	2573	Branched alkane	0	0	0	0	0	0	0	0	0	0	3.90837	3.68029	5.08614	6.19817	4.49562	6.36783	4.81728	3.92665	4.16275	3.90837	0	0	0	0	0	0	0	0	0	0	0	0	0	0	0	0	0	0	0	0	0	0	0	0	0	0
58	Unidentified	2577-2578	Branched alkane	0	0	0	0	0	0	0	0	0	0	0	0.523778	0.709598	0.87213	1.58202	0.411983	0	0.458408	0.525455	0	0	0	0	0.651427	0	0	0	0	0	0	0	0	0	0	0	0	0	0	0	0	0	0	0	0	0	0
59	Unidentified	2589-2590	Unsaturated	0	0	0	0	0	0	0	0	0	0	0	0.579155	0	0	1.96072	0	0	0.346601	0	0	0.4477	0.469066	0	0.473765	0	0.490604	0.606187	0	0	0	0	0	0	0	0	0	0	0	0	0	0	0	0	0	0	0
60	Unidentified	2593-2594	Branched alkane	0	0	0	0	0	0	0	0	0	0	1.0076	1.12139	1.15669	1.3939	1.17582	1.63002	2.04724	0.858676	1.04887	1.0076	1.23457	2.97786	1.36923	6.19448	1.15304	0.962696	1.58301	1.30774	1.45707	0	0	0	NA	NA	0	0	0	0	0	0	0	0	0	0	0	0
61	Hexacosane	2600	Alkane	0	0	0	0	0	0	0	0	0	0	0	0	0	0.753661	0	0	0.896426	0.453936	0	0	0	0.678725	0	0.663271	0	0	0.758599	0.662953	0.762685	0	0	0	0	0	0	0	0	0	0	0	0	0	0	0	0	0
62	12/14-methyl-hexacosane	2629-2630	Branched alkane	0	0	0	0	0	0	0	0	0	0	0	0	0	0	0	0	0	0.292934	0	0	0.719034	0.717814	0.517777	0.935686	0.49416	0.647968	0.772455	0.54792	0.691539	0	0	0	0	0	0	0	0	0	0	0	0	0	0	0	0	0
63	3-methyl-hexacosane	2651	Branched alkane	0	0	0	0	0	0	0	0	0	0	0.61794	0.860657	0.578343	0.741058	0	0.501545	1.01353	0.572451	0.404825	0.61794	0	0	0	0	0	0	0	0	0	0	0	0	0	0	0	0	0	0	0	0	0	0	0	0	0	0
64	n-trimethyl-hexacosane	2671-2672	Branched alkane	0	0	0	0	0	0	0	0	0	0	0.423112	0.479937	0.602953	0.554533	0	0.385115	0.557238	0.299642	0.329176	0.423112	0.420567	0.284283	0.414222	0.450077	0.711291	0.453578	0.439918	0.40867	0.461026	0	0	0	0	0	0	0	0	0	0	0	0	0	0	0	0	0
65	Unidentified	2679	Unsaturated	0	0	0	0	0	0	0	0	0	0	0.344393	0	0.278917	0.552013	0.632196	0.591107	0.456289	0.315295	0.537722	0.344393	0	0.24164	0.310666	0.0710648	0.389338	0	0.460702	0.220984	0.503714	0	0	0	0	0	0	0	0	0	0	0	0	0	0	0	0	0
66	Heptacosane	2694-2695	Alkane	0	0	0	0	0	0	0	0	0	0	0	0.359953	0	0.335241	0	0	0.456289	0	0	0	0.420567	0.266515	0	0.68696	0	0.370268	0.387959	0	0.307351	0	0	0	0	0	NA	0	0	0	0	0	0	0	0	0	0	0
67	Unidentified	2719	Branched alkane	0	0	0	0	0	0	0	0	0	0	0.533318	0.36226	0.315833	0.476395	0	0.367203	0.633959	0.292934	0.288285	0.533318	0	0	0	0	0	0	0	0	0	0	0	0	0	0	0	0	0	0	0	0	0	0	0	0	0	0
68	11/13-methyl-heptacosane	2727-2729	Branched alkane	0	0	0	0	0	0	0	0	0	0	0	0	0	0	0.787955	0	0	0	0	0	0.501967	0.632529	0.67311	0.130285	0.389338	0.527631	0.550764	0.487377	0.563476	0	0	0	0	0	0	0	0	0	0	0	0	0	0	0	0	0
69	7-methyl-heptacosane	2735-2737	Branched alkane	0	0	0	0	0	0	0	0	0	0	3.91821	2.33046	3.26497	4.23714	4.25434	5.61999	3.77953	2.95394	3.65774	3.91821	2.37417	4.69066	3.50938	4.55999	2.77778	2.16606	3.71679	2.51559	2.47588	0	0	0	0	0	0	0	0	0	0	0	0	0	0	0	0	0
70	Unidentified	2744	Branched alkane	0	0	0	0	0	0	0	0	0	0	0	0	0	0	0	0	0	0	0	0	0	0	0	0	0	0	0	0	0	0	0	0	0	0	0	0	0	0	0	0	0	0	0	0	0	0
71	3-methyl-heptacosane	2767-2768	Branched alkane	0	0	0	0	0	0	0	0	0	0	0	0	0	0	0	0	0	0	0	0	0	0	0	0	0	0	0	0	0	0	0	0	0	0	0	0	0	0	0	0	0	0	0	0	0	0
72	3-methyl-heptacosane	2770-2771	Branched alkane	0	0	0	0	0	0	0	0	0	0	5.18951	2.33046	4.40525	7.70297	8.11471	10.2772	8.41914	5.5814	9.54406	5.18951	0.407	0.525923	0.442987	0.0710648	0.726265	0	0.578475	0.675062	0.523635	0	0	0	0	0	0	0	0	0	0	0	0	0	0	0	0	0
73	Unidentified	2778	Branched alkane	0	0	0	0	0	0	0	0	0	0	0	0	0	0	0	0	0	0	0	0	0	0	0	0	0	0	0	0	0	0	0	0	0	0	0	0	0	0	0	0	0	0	0	0	0	0
74	Octacosane	2790	Alkane	0	0	0	0	0	0	0	0	0	0	0	0	0	0	0	0	0	0	0	0	0	0	0	0	0	0	0	0	0	0	0	0	0	0	0	0	0	0	0	0	0	0	0	0	0	0
75	Unidentified	2796	Branched alkane	0	0	0	0	0	0	0	0	0	0	0	0	7.05496	5.7243	1.60645	0.434374	3.30305	11.7554	9.44592	0	3.9886	4.56984	6.21332	1.25548	6.14705	7.29427	6.72348	4.71333	8.18748	0	0	0	NA	0	0	0	0	0	0	0	0	0	0	0	0	0
76	10-methyl-octacosane	2831	Branched alkane	0	0	0	0	0	0	0	0	0	0	0	0	0	0	0	0	0	0	0	0	0	0.557905	0	8.21983	2.93501	0	3.69947	14.8786	7.06907	0	0	0	0	0	0	0	0	0	0	0	0	0	0	0	0	0
77	Unidentified	2875-2886	Branched alkane	0	0	0	0	0	0	0	0	0	0	13.6104	10.7524	2.43232	0	2.27835	0	3.2344	0	0	13.6104	0	0	0	0	0	0	0	0	0	0	0	0	0	0	0	0	0	0	0	0	0	0	0	0	0	0
78	Nonacosane	2898	Alkane	0	0	0	0	0	0	0	0	0	0	3.29437	1.85745	0	3.28183	0	2.78089	0	2.2093	2.65794	3.29437	2.4013	2.40219	3.18145	0.615895	1.80443	3.06396	2.88891	2.35212	2.45311	0	0	0	0	0	NA	0	0	0	0	0	0	0	0	0	0	0
79	Unidentified	2901-2003	Unsaturated	0	0	0	0	0	0	0	0	0	0	0	0	0	0	0	0	0	0	0	0	0	0	0	0	0	0	0	0	0	0	0	0	0	0	0	0	0	0	0	0	0	0	0	0	0	0
80	Unidentified	2927-2929	Branched alkane	0	0	0	0	0	0	0	0	0	0	0	0	0	0	0	0	0	0	0	0	0	0	0	0	0	0	0	0	0	0	0	0	0	0	0	0	0	0	0	0	0	0	0	0	0	0
81	7-methyl-nonacosane	2931-2934	Branched alkane	0	0	0	0	0	0	0	0	0	0	0.470343	0.5307	0.389664	0.741058	2.03708	0.335856	0.39572	0.503131	0.378246	0.470343	0	0.373121	0	0.521142	0	0.453578	0.412207	0.444996	0.466718	0	0	0	0	0	0	0	0	0	0	0	0	0	0	0	0	0
82	Unidentified	2938-2939	Branched alkane	0	0	0	0	0	0	0	0	0	0	0	0	0	0	0	0	0	0	0	0	0	0	0	0	0	0	0	0	0	0	0	0	0	0	0	0	0	0	0	0	0	0	0	0	0	0
83	Unidentified	2947-2948	Branched alkane	0	0	0	0	0	0	0	0	0	0	0	0	0	0	0	0	0	0	0	0	0	0	0	0	0	0	0	0	0	0	0	0	0	0	0	0	0	0	0	0	0	0	0	0	0	0
84	Unidentified	2957	Branched alkane	0	0	0	0	0	0	0	0	0	0	0	0	0	0	0	0	0	0	0	0	0	0	0	0	0	0	0	0	0	0	0	0	0	0	0	0	0	0	0	0	0	0	0	0	0	0
85	Unidentified	2969	Branched alkane	0	0	0	0	0	0	0	0	0	0	0	0	0	0	0	0	0	0	0	0	0	0	0	0	0	0	0	0	0	0	0	0	0	0	0	0	0	0	0	0	0	0	0	0	0	0
86	n-dimethyl nonacosane	2970-2972	Branched alkane	0	0	0	0	0	0	0	0	0	0	0	0	0	0	0	0	0	0	0	0	0	0	0	0	0	0	0	0	0	0	0	0	0	0	0	0	0	0	0	0	0	0	0	0	0	0
87	n-dimethyl nonacosane	2978	Branched alkane	0	0	0	0	0	0	0	0	0	0	0	0	0	0	0	0	0	0	0	0	0	0	0	0	0	0	0	0	0	0	0	0	0	0	0	0	0	0	0	0	0	0	0	0	0	0
88	Triacontane	2998	Alkane	0	0	0	0	0	0	0	0	0	0	2.27693	2.24509	1.34947	2.23326	1.60034	2.12261	3.52514	2.33005	1.58045	2.27693	2.28599	2.17121	2.41629	0.438233	2.25367	2.5641	2.016	1.53176	2.24252	0	0	0	0	0	0	0	0	0	0	0	0	0	0	0	0	0
89	Unidentified	3079	Unsaturated	0	0	0	0	0	0	0	0	0	0	0	0	0	0	0	0	0	0	0	0	0	0	0	0	0	0	0	0	0	0	0	0	0	0	0	0	0	0	0	0	0	0	0	0	0	0
90	Hentriacontane	3100	Alkane	0	0	0	0	0	0	0	0	0	0	0.49199	0.459171	0.557834	0.380611	1.01396	0.806054	0	0	0.740135	0.49199	0	0	0	0	0	0	0	0	0	0	0	0	0	0	0	0	0	0	0	0	0	0	0	0	0	0
91	Unidentified	3156	Branched alkane	0	0	0	0	0	0	0	0	0	0	0	0	0	0	0	0	0	0	0	0	0	0	0	0	0	0	0	0	0	0	0	0	0	0	0	0	0	0	0	0	0	0	0	0	0	0
92	n-tetramethyl triacontane	3166-3167	Branched alkane	0	0	0	0	0	0	0	0	0	0	0	0	0	0	0	0	0	0	0	0	0	0	0	0	0	0	0	0	0	0	0	0	0	0	0	0	0	0	0	0	0	0	0	0	0	0
93	n-tetramethyl triacontane	3169	Branched alkane	0	0	0	0	0	0	0	0	0	0	0	0	0	0	0	0	0	0	0	0	0	0	0	0	0	0	0	0	0	0	0	0	0	0	0	0	0	0	0	0	0	0	0	0	0	0
94	Dotriacontane	3180	Alkane	0	0	0	0	0	0	0	0	0	0	0	0	0	0	0	0	0	0	0	0	0	0	0	0	0	0	0	0	0	0	0	0	0	0	0	0	0	0	0	0	0	0	0	0	0	0
95	Unidentified	3233	Branched alkane	0	0	0	0	0	0	0	0	0	0	0	0	0	0	0	0	0	0	0	0	0	0	0	0	0	0	0	0	0	0	0	0	0	0	0	0	0	0	0	0	0	0	0	0	0	0
96	Unidentified	3256	Branched alkane	0	0	0	0	0	0	0	0	0	0	0	0	0	0	0	0	0	0	0	0	0	0	0	0	0	0	0	0	0	0	0	0	0	0	0	0	0	0	0	0	0	0	0	0	0	0
97	n-tetrametil dotriacontane	3264	Branched alkane	0	0	0	0	0	0	0	0	0	0	0	0	0	0	0	0	0	0	0	0	0	0	0	0	0	0	0	0	0	0	0	0	0	0	0	0	0	0	0	0	0	0	0	0	0	0
98	unidentified	3265-3270	Branched alkane	0	0	0	0	0	0	0	0	0	0	0	0	0	0	0	0	0	0	0	0	0	0	0	0	0	0	0	0	0	0	0	0	0	0	0	0	0	0	0	0	0	0	0	0	0	0
99	Tritriacontano	3300	Alkane	0	0	0	0	0	0	0	0	0	0	0	0	0.21329	0	0.891794	0.340334	0.343226	0	0.490697	0	0	0	0	0	0	0	0	0	0	0	0	0	0	0	0	0	0	0	0	0	0	0	0	0	0	0
100	7-heptiltritriacontane	3334-3335	Branched alkane	0	0	0	0	0	0	0	0	0	0	0	0	0	0	0	0	0	0	0	0	0	0	0	0	0	0	0	0	0	0	0	0	0	0	0	0	0	0	0	0	0	0	0	0	0	0
101	unidentified	3337-3338	Branched alkane	0	0	0	0	0	0	0	0	0	0	0	0	0	0	0	0	0	0	0	0	0	0	0	0	0	0	0	0	0	0	0	0	0	0	0	0	0	0	0	0	0	0	0	0	0	0
102	Unidentified	3355-3356	Branched alkane	0	0	0	0	0	0	0	0	0	0	0	0	0	0	0	0	0	0	0	0	0	0	0	0	0	0	0	0	0	0	0	0	0	0	0	0	0	0	0	0	0	0	0	0	0	0
103	Unidentified	3357-3358	Branched alkane	0	0	0	0	0	0	0	0	0	0	0	0	0	0	0	0	0	0	0	0	0	0	0	0	0	0	0	0	0	0	0	0	0	0	0	0	0	0	0	0	0	0	0	0	0	0
104	n- dimethyl tritriacontane	3364-3366	Branched alkane	0	0	0	0	0	0	0	0	0	0	0	0	0	0	0	0	0	0	0	0	0	0	0	0	0	0	0	0	0	0	0	0	0	0	0	0	0	0	0	0	0	0	0	0	0	0
105	Unidentified	3367-3370	Branched alkane	0	0	0	0	0	0	0	0	0	0	0	0	0	0	0	0	0	0	0	0	0	0	0	0	0	0	0	0	0	0	0	0	0	0	0	0	0	0	0	0	0	0	0	0	0	0
106	Tetratriacontane	3406	Alkane	0	0	0	0	0	0	0	0	0	0	0	0	0	0	0	0	0	0	0	0	0	0	0	0	0	0	0	0	0	0	0	0	0	0	0	0	0	0	0	0	0	0	0	0	0	0
107	Unidentified	3412-3414	Branched alkane	0	0	0	0	0	0	0	0	0	0	0	0	0	0	0	0	0	0	0	0	0	0	0	0	0	0	0	0	0	0	0	0	0	0	0	0	0	0	0	0	0	0	0	0	0	0
108	Unidentified	3433-3437	Branched alkane	0	0	0	0	0	0	0	0	0	0	0	0	0	0	0	0	0	0	0	0	0	0	0	0	0	0	0	0	0	0	0	0	0	0	0	0	0	0	0	0	0	0	0	0	0	0
109	n-methyl tetratriacontane	3462-3466	Branched alkane	0	0	0	0	0	0	0	0	0	0	0	0	0	0	0	0	0	0	0	0	0	0	0	0	0	0	0	0	0	0	0	0	0	0	0	0	0	0	0	0	0	0	0	0	0	0
110	Unidentified	3467-3468	Branched alkane	0	0	0	0	0	0	0	0	0	0	0	0	0	0	0	0	0	0	0	0	0	0	0	0	0	0	0	0	0	0	0	0	0	0	0	0	0	0	0	0	0	0	0	0	0	0
111	n-methyl-pentatriacontane	3533-3538	Branched alkane	0	0	0	0	0	0	0	0	0	0	0	0	0	0	0	0	0	0	0	0	0	0	0	0	0	0	0	0	0	0	0	0	0	0	0	0	0	0	0	0	0	0	0	0	0	0
112	Unidentified	3561-3564	Branched alkane	0	0	0	0	0	0	0	0	0	0	0	0	0	0	0	0	0	0	0	0	0	0	0	0	0	0	0	0	0	0	0	0	0	0	0	0	0	0	0	0	0	0	0	0	0	0
113	Unidentified	3566-3568	Branched alkane	0	0	0	0	0	0	0	0	0	0	0	0	0	0	0	0	0	0	0	0	0	0	0	0	0	0	0	0	0	0	0	0	0	0	0	0	0	0	0	0	0	0	0	0	0	0
114	Hexatriacontane	3589-3591	Alkane	0	0	0	0	0	0	0	0	0	0	0	0	0	0	0	0	0	0	0	0	0	0	0	0	0	0	0	0	0	0	0	0	0	0	0	0	0	0	0	0	0	0	0	0	0	0
[truncated: 20 more columns]
